1           **Antibiotic resistance among *Escherichia coli* and *Salmonella***  
2           **isolated from dairy cattle feces in Texas**

3  
4  
5   **Rosine Manishimwe<sup>1,2</sup>, Paola M. Moncada<sup>1</sup>, Marie Bugarel<sup>1</sup>, H. Morgan Scott<sup>3</sup> and Guy**  
6   **H. Loneragan<sup>4\*</sup>**

7  
8  
9  
10  
11  
12   <sup>1</sup>Department of Animal and Food Sciences, Texas Tech University, Lubbock, Texas, United  
13   States of America

14  
15   <sup>2</sup>Department of Veterinary Medicine, College of Agriculture, Animal Sciences and  
16   Veterinary Medicine, University of Rwanda, Nyagatare, Rwanda

17  
18   <sup>3</sup>Department of Veterinary Pathobiology, College of Veterinary Medicine and  
19   Biomedical Sciences, Texas A&M University, College Station, Texas, United States of  
20   America

21  
22   <sup>4</sup>School of Veterinary Medicine, Texas Tech University, Amarillo, Texas, United States of  
23   America

24  
25  
26  
27  
28   \*Corresponding author: RM

29   E-mail: [rosine.manishimwe@ttu.edu](mailto:rosine.manishimwe@ttu.edu) or [r.manishimwe@ur.ac.rw](mailto:r.manishimwe@ur.ac.rw)

30   Author Contributions:

31   Conceptualization: RM, PMM, MB, HMS and GH. Data curation: RM and PMM. Data  
32   analysis: RM. Writing – original draft: RM. Writing – review & editing: RM, HMS, and  
33   GHL.

34  
35  
36  
37  
38  
39  
40

## 41 **Abstract**

42           This study was conducted to develop and field-test a low cost protocol to estimate the  
43 isolate- and sample-level prevalence of resistance to critically important antibiotic drugs  
44 among *Escherichia coli* and *Salmonella* isolated from dairy cattle feces. *E. coli* and  
45 *Salmonella* were isolated from and screened on selective media, with and without antibiotics  
46 respectively. Bacterial isolates were further tested for susceptibility to a suite of antibiotics  
47 using disk diffusion. Molecular methods were performed on select bacterial isolates to  
48 identify and distinguish genetic determinants associated with the observed phenotypes.  
49 Among 85 non-type-specific *E. coli* randomly isolated from MacConkey agar without  
50 antibiotics, the isolate-level prevalence of resistance to tetracycline was the highest (8.2%),  
51 there was no isolate resistant to third-generation cephalosporin (0.0%) and one isolate was  
52 resistant to nalidixic acid (1.2%). Among 37 *E. coli* recovered from MacConkey agar with  
53 cefotaxime at 1.0µg/ml, 100% were resistant to ampicillin and 56.8% were resistant to a third-  
54 generation cephalosporin (ceftriaxone). Among 22 *E. coli* isolates recovered from  
55 MacConkey agar with ciprofloxacin at 0.5µg/ml, 90.9% were resistant to tetracycline whereas  
56 77.3% and 54.5% were resistant to nalidixic acid and ciprofloxacin respectively. Sixteen  
57 *Salmonella* were isolated and only one demonstrated any resistance (i.e., single resistance to  
58 streptomycin). Among *E. coli* isolates that were either resistant or intermediate to ceftriaxone,  
59 an AmpC phenotype was more common than an extended spectrum beta-lactamase (ESBL)  
60 phenotype (29 versus 10 isolates, respectively). Among 24 *E. coli* isolates that were whole  
61 genome sequenced, phenotypic profiles of antibiotic resistance detected were generally  
62 substantiated by genotypic profiles. For instance, all isolates with an AmpC phenotype carried  
63 a *bla*<sub>CMY2</sub> gene. The protocol used in this study is suited to detecting and estimating

64 prevalence of antimicrobial resistance in bacteria isolated from food animal feces in resource-  
65 limited laboratories in the developing world.

## 66 **Introduction**

67 Monitoring of the emergence, spread, and changes in levels of antimicrobial resistant  
68 bacteria along the food chain is needed to inform and guide integrated strategies for  
69 combating antimicrobial resistance[1]. In most cases, surveillance systems of antibiotic  
70 resistant bacteria in food animals target pathogenic bacteria, such as *Salmonella* and  
71 *Campylobacter* as well as indicator bacteria, such as *E. coli* and *Enterococcus spp.* After their  
72 isolation from samples, genus/species confirmation, and subtyping when necessary, the  
73 bacteria of interest are tested for susceptibility to a select number of antibiotics using a  
74 standard phenotyping method of choice. Even though the broth microdilution method is  
75 preferred in many surveillance systems and in research [2–4], other less technology intensive  
76 methods of antibiotic susceptibility testing, such as disk diffusion, may also be used[1,5].  
77 After phenotypic antibiotic susceptibility testing, genetic characterization can be done through  
78 the detection of targeted genes or through whole genome sequencing (WGS). Additionally,  
79 the selective culture and detection of bacteria with rare antimicrobial resistance (AMR)  
80 mechanisms is highly recommended[1].

81 In many developed countries, AMR surveillance systems are replacing phenotypic  
82 antimicrobial susceptibility testing with WGS[6,7]. In many developing countries, however,  
83 surveillance systems are still not well established and the startup costs associated with  
84 equipment acquisition and maintenance can be prohibitive [8]. One of the main reasons  
85 impeding the establishment of AMR surveillance systems in these countries is the lack of  
86 sufficient resources needed for establishment, and then sustainment of the surveillance

87 systems[8,9]. An inexpensive and reliable protocol that can generate sufficient high quality  
88 and reproducible information of the burden of antibiotic resistance among isolated bacteria  
89 would be one of the most helpful solutions for establishment of an AMR surveillance system  
90 in situation where resources are limited. Studies have demonstrated that the disk diffusion  
91 method is a cost effective method that can generate results comparable to other phenotypic  
92 methods of antibiotic susceptibility testing, that is, such as the broth microdilution or the agar  
93 dilution methods[10]. This method can be used efficiently to establish phenotypic  
94 antimicrobial resistance profiles and to detect mechanisms of resistance such as the  
95 production of extended spectrum beta-lactamases (ESBLs) among bacterial isolates.

96 We designed a protocol that uses the disk diffusion method to determine the isolate-level  
97 prevalence of resistant to various antibiotics and the sample-level prevalence of any bacteria  
98 not susceptible to third-generation cephalosporin or quinolone antibiotics. Additionally, the  
99 protocol described herein was designed to estimate the proportion of bacteria resistant to  
100 third-generation cephalosporins that produce either ESBL or AmpC enzymes. Afterward, the  
101 developed protocol was field-tested on fecal samples collected from dairy cattle to estimate  
102 isolate-level and sample-level prevalence of AMR among *E. coli* and isolate-level and  
103 sample-level prevalence among *Salmonella*.

## 104 **Materials and Methods**

### 105 **Sample collection**

106 Using a convenience sampling scheme, we collected 85 freshly voided fecal samples from  
107 dairy cattle of different age groups at a dairy farm located near Lubbock, Texas. Fecal  
108 samples were aseptically collected into sterilized polypropylene specimen containers then  
109 kept on wet ice and transported to a microbiology laboratory at Texas Tech University.

110 As fecal samples were collected from the pen-floor, there was no interaction with  
111 vertebrate animals, consequently an approval from an Institutional Animal Care and Use  
112 Committee wasn't needed.

### 113 **Isolation of bacteria from fecal samples**

114 In the laboratory, 10g of each fecal sample was weighted in a 710mL Whirl Pak® bag  
115 (Whirl-Pak, Madison, Wisconsin) and 90mL of buffered peptone water (Becton Dickinson,  
116 New Jersey, United States) was added. The mixture was placed in a commercial stomacher  
117 for 2 minutes at 230 rpm. Thereafter, the mixture was incubated at 42°C overnight prior to  
118 isolation of *E. coli* and *Salmonella*.

### 119 **Isolation and identification of *Escherichia coli***

120 From each overnight non-selective enrichment, a 10µL loopful was streaked onto  
121 MacConkey agar (MAC, Hardy Diagnostics, California, United States) to isolate non-type-  
122 specific *E. coli*(NTS *E. coli*), meanwhile, another 10 µL loopful was streaked onto MAC  
123 supplemented with 1µg/mL of cefotaxime (MAC+CTX) to screen for *E. coli* resistant to third-  
124 generation cephalosporins (3GCr *E. coli*). An additional 10 µL loopful was streaked onto  
125 MAC supplemented with 0.5µg/mL of ciprofloxacin (MAC+CIP) to screen for *E. coli* not  
126 susceptible to quinolones (Qr *E. coli*). All three MacConkey agar plate types were incubated  
127 at 37°C overnight. Following the incubation, agar plates were inspected to identify growth of  
128 colonies with typical morphology of *E. coli* (i.e., pink, convex, circular and dry colonies with  
129 a surrounding pink zone). From each type of MacConkey agar plate, one typical colony was  
130 selected and re-streaked onto a similar MacConkey agar plate type for isolation of pure  
131 colonies. All well isolated presumptive *E. coli* were tested for indole production using an

132 indole spot test (Hardy Diagnostics, California, United States) and were confirmed as *E. coli*  
133 by detection of the *wecA* gene using a real time polymerase chain reaction (rtPCR).

#### 134 **Isolation and identification of *Salmonella***

135 One mL of each overnight non-selective enrichment was transferred into 9mL of  
136 Rappaport-Vassiliadis *Salmonella* broth (Hardy Diagnostics, California, United States) and  
137 another 1mL was transferred into 9mL of tetrathionate broth (Hardy Diagnostics, California,  
138 United States). Both inoculated broths were incubated at 42°C overnight. After incubation, a  
139 10µL loopful of each broth was streaked onto brilliant green sulfa agar (BGS, Becton  
140 Dickson, New Jersey, United States) and onto xylose lysine deoxycholate agar (XLD, Hardy  
141 Diagnostics, California, United States) to isolate *Salmonella*. In addition, 10 µL loopful of  
142 each broth was streaked onto BGS and onto XLD agar plates, each supplemented with  
143 1µg/mL of cefotaxime (BGS+CTX and XLD+CTX) to screen for *Salmonella* resistant to  
144 third-generation cephalosporins. Another 10µL loopful of each broth was streaked onto BGS  
145 and XLD agar plates both supplemented with 0.5µg/mL of ciprofloxacin (BGS+CIP and  
146 XLD+CIP) to screen for *Salmonella* not susceptible to quinolones. All agar plates were  
147 incubated at 37°C overnight. Following incubation, agar plates were inspected for growth of  
148 colonies with morphology typical of *Salmonella* (i.e, pink, circular, dry, convex colonies on  
149 BGS; black, circular convex colonies on XLD). From each type of agar plate, a single typical  
150 colony was selected to be re-streaked onto the same type of agar plate for isolation of pure  
151 colonies. All presumptive *Salmonella* were tested for production of H<sub>2</sub>S gas, dextrose  
152 fermentation and decarboxylation reaction using lysine iron agar (Hardy Diagnostics,

153 California, United States) and were confirmed to be *Salmonella* by detection of the *ttrC* gene  
154 using rtPCR.

## 155 **Antibiotic susceptibility testing**

156 All isolates confirmed as *E. coli* and *Salmonella* were tested for susceptibility to a panel of  
157 12 antibiotics using the disk diffusion method in accordance to guidelines of the Clinical  
158 Laboratory Standard Institute (CLSI)[11]. The antibiotics and concentration in each disk were  
159 amoxicillin-clavulanic acid 20/10µg(AMC), ampicillin 10µg (AMP), azithromycin 15µg  
160 (AZI), cefoxitin 30µg (FOX), ceftriaxone 30µg (CRO), chloramphenicol 30µg (CHL),  
161 ciprofloxacin 5µg (CIP), colistin 10µg (COL), meropenem 10µg (MER), nalidixic acid 30µg  
162 (NAL),streptomycin 10µg (STR), and tetracycline 30µg (TET). Inhibition zone diameters  
163 around the antibiotic-impregnated disks were measured in mm and rounded to the closest  
164 integer before being compared to the CLSI clinical break points in order to classify each  
165 bacterial isolate as resistant, intermediate or susceptible[11]. Because there was no CLSI  
166 standard inhibition zone diameters for colistin, these data were interpreted in accordance with  
167 a study conducted by Galani and collaborators[12].

168 Based on previous investigation of antimicrobial resistance in the region, all bacterial  
169 isolates not susceptible (i.e., intermediate and resistant) to a third-generation cephalosporin  
170 (ceftriaxone) were expected to have a phenotype reflecting ESBL- or AmpC-production.  
171 Suspected ESBL- or AmpC beta-lactamase-producing bacteria were discriminated by the  
172 combination disk test (CDT) according to CLSI guidelines[11] using a second panel of 12  
173 antibiotic-impregnated disks. In addition to cefotaxime 30µg (CTX), cefotaxime-clavulanic  
174 acid 30/10µg (CTX-CLA), ceftazidime 30µg (CAZ), and ceftazidime-clavulanic acid 30/10µg  
175 (CAZ-CLA), the 4 antibiotic disks required by the CDT method, the second panel of

176 antibiotics included amikacin 30 $\mu$ g (AMK), cefazolin 30 $\mu$ g (CFZ), cefepime 30 $\mu$ g, (FEP),  
177 fosfomycin 200 $\mu$ g (FOS), gentamicin 10 $\mu$ g (GEN), imipenem 10 $\mu$ g (IMP), sulfisoxazole  
178 300 $\mu$ g (SSS), and trimethoprim/sulfamethoxazole 1.25/23.75 $\mu$ g (SXT). A bacterial isolate was  
179 classified to have a phenotype of ESBL-production when the absolute difference between the  
180 inhibition zone diameter around ceftazidime (coded as resistant) versus ceftazidime-  
181 clavulanic acid (CLA) and/or around cefotaxime (coded as resistant) versus cefotaxime-  
182 clavulanic acid was equal to or greater than 5mm. An isolate was classified to have a  
183 phenotype of AmpC beta-lactamase production when the difference between the inhibition  
184 zone diameter around ceftazidime (coded as resistant) versus ceftazidime-clavulanic acid  
185 and/or around cefotaxime (coded as resistant) versus cefotaxime-clavulanic acid was less than  
186 5mm[11].

187 *E.coli* ATCC 25922 and *Klebsiella pneumoniae* ATCC 700603 were used as quality  
188 control strains.

## 189 **Polymerase chain reaction to detect genes encoding for beta-** 190 **lactamases**

191 All isolates confirmed as exhibiting either a phenotype suggestive of ESBL or else  
192 AmpC beta-lactamase-production were subjected to DNA extraction using a boiling  
193 preparation method. The extracted DNA was used as a template to detect the family of  
194 *bla*<sub>CTX-M</sub> genes (genes encoding for ESBL production) or *bla*<sub>CMY-2</sub> gene (gene encoding for  
195 AmpC beta-lactamase production) by conventional PCR (cPCR), using previously published  
196 primers[13].



## 197 **Whole genome sequencing (WGS)**

198       Following phenotypic AMR characterization, 24 *E. coli* isolates classified as either ESBL  
199 or AmpC phenotypes, resistant to NAL or reduced susceptibility to CIP were selected for  
200 WGS. The DNA was extracted using a commercial DNA extraction kit (Qiagen, Venlo,  
201 Netherland), libraries were prepared using the Nextera XT DBA library preparation kit  
202 (Illumina, California, United States) and the sequencing was performed using an Illumina  
203 Miseq (Illumina, California, United States). Generated raw reads (fastq files) were assembled  
204 using SPAdes 3.9 on the Center for Genomic Epidemiology platform.

## 205 **Data analysis**

206       The prevalence proportion (expressed as percentage) of bacteria resistant to each tested  
207 antibiotic was determined and confidence intervals were calculated as 95% binomial  
208 proportions representing Wilson intervals using R.3.0. software. The proportion (expressed as  
209 percentages) of samples with bacteria not susceptible (i.e., resistant or intermediate) to a third-  
210 generation cephalosporin (ceftriaxone) or else to quinolones (nalidixic acid and/or  
211 ciprofloxacin) was calculated by dividing the number of samples with non-susceptible  
212 bacteria by the total number of collected samples collected (i.e., only those isolates screened  
213 on media with antibiotics were used to calculate the sample-level percentages). Whole  
214 genome sequencing data were analyzed using various bioinformatic tools found on the  
215 website of the Center for Genomic Epidemiology, including Resfinder3.0 that detect  
216 mobilizable genes and chromosomal mutations conferring antibiotic resistance in bacteria.

## 217 Results

### 218 Isolated bacteria

219 In total, NTS *E. coli* were recovered from all 85 fecal samples. The recovery rate of  
 220 *Salmonella* and of either bacterial species (i.e., *E. coli* or *Salmonella enterica*) presumptively  
 221 resistant to third-generation cephalosporins or else resistant/reduced susceptibility to  
 222 quinolones was lower (Table 1).

223 **Table 1. Numbers of bacteria isolated from dairy cattle feces at a dairy farm in Texas**

| Bacteria                     | Culture medium of isolation | #of samples | # of isolates | %      |
|------------------------------|-----------------------------|-------------|---------------|--------|
| <b><i>E. coli</i></b>        |                             |             |               |        |
| NTS <i>E. coli</i>           | MAC                         | 85          | 85            | 100.0% |
| Pres. 3GCr <i>E. coli</i>    | MAC + CTX                   | 85          | 37            | 43.5%  |
| Pres. Qr <i>E. coli</i>      | MAC + CIP                   | 85          | 22            | 25.9%  |
| <b><i>Salmonella</i></b>     |                             |             |               |        |
| <i>Salmonella</i>            | BGS or XLD                  | 85          | 16            | 18.8%  |
| Pres. 3GCr <i>Salmonella</i> | BGS + CTX or XLD + CTX      | 85          | 1             | 1.2%   |
| Pres. Qr <i>Salmonella</i>   | BGS + CIP or XLD + CIP      | 85          | 0             | 0.0%   |

224 #: number; MAC: MacConkey agar; BGS: brilliant green sulfa; XLD: xylose lysine deoxycholate.  
 225 MAC+CTX, BGS+CTX, XLD+CTX: respective culture medium supplemented with 1 µg/mL of  
 226 cefotaxime. MAC+CIP, BGS+CIP, XLD+CIP: respective culture medium supplemented with 0.5  
 227 µg/mL of ciprofloxacin. Pres.3GCr: presumptive third-generation cephalosporin resistant, Pres. Qr:  
 228 Presumptive quinolone resistant (or reduced susceptibility).

### 229 Antibiotic resistance among isolated bacteria

230 Antibiotic susceptibility testing of isolated bacteria showed that resistance to  
 231 antibiotics was rare among NTS *E. coli* isolated on MAC when compared to presumptive  
 232 3GCr *E. coli* screened on MAC+CTX or else presumptive Qr *E. coli* screened on MAC+CIP.  
 233 Isolate-level prevalence of resistance to tetracycline (8.2%) was the highest among NTS *E.*  
 234 *coli* isolates while resistance to ceftiofloxacin, colistin, meropenem, ceftriaxone, and ciprofloxacin  
 235 were completely absent among these bacterial isolates (Table 2).

236 **Table 2. Distribution of inhibition zone diameters of non-type-specific *E. coli* (n=85) isolated on plain MacConkey agar**  
 237 **(without antibiotic)**

| ATB  | % R | 95% CI     | Distribution (number) for inhibition zone diameters in mm |   |   |   |    |    |    |    |    |    |    |    |    |    |    |    |    |    |    |    |    |    |    |    |    |     |    |    |
|------|-----|------------|-----------------------------------------------------------|---|---|---|----|----|----|----|----|----|----|----|----|----|----|----|----|----|----|----|----|----|----|----|----|-----|----|----|
|      |     |            | 0                                                         | 7 | 8 | 9 | 10 | 11 | 12 | 13 | 14 | 15 | 16 | 17 | 18 | 19 | 20 | 21 | 22 | 23 | 24 | 25 | 26 | 27 | 28 | 29 | 30 | >30 |    |    |
| AMC  | 1.2 | 0.2 - 6.4  |                                                           |   |   |   |    |    |    | 1  |    |    |    | 1  | 4  | 3  |    | 8  | 9  | 13 | 11 | 18 | 10 | 3  | 2  | 1  | 1  | 0   |    |    |
| AMP  | 3.5 | 1.2 - 9.9  | 2                                                         |   |   |   |    | 1  |    |    |    |    | 3  | 2  | 2  | 3  | 6  | 11 | 16 | 14 | 10 | 10 | 2  | 2  |    | 1  |    | 0   |    |    |
| AZI  | 1.2 | 0.2 - 6.4  |                                                           |   |   |   |    |    |    | 1  |    | 3  | 5  | 10 | 12 | 22 | 7  | 12 | 3  | 3  | 2  | 3  |    |    |    |    | 1  | 1   | 0  |    |
| FOX  | 0.0 | 0.0 - 4.3  |                                                           |   |   |   |    |    |    |    |    |    |    |    |    |    |    | 2  | 7  | 3  | 3  | 14 | 24 | 14 | 10 | 5  | 3  | 0   |    |    |
| CRO  | 0.0 | 0.0 - 4.3  |                                                           |   |   |   |    |    |    |    |    |    |    |    |    |    |    |    |    |    |    | 2  |    |    | 1  | 1  | 2  | 7   | 72 |    |
| CHL  | 4.7 | 1.8 - 11.5 | 3                                                         | 1 |   |   |    |    |    |    |    |    |    |    | 1  |    | 6  | 1  | 6  | 8  | 11 | 11 | 17 | 10 | 6  | 3  | 1  | 0   |    |    |
| CIP  | 0.0 | 0.0 - 4.3  |                                                           |   |   |   |    |    |    |    |    |    |    |    | 1  |    |    |    |    |    |    |    |    | 3  | 1  | 1  | 4  | 8   | 66 |    |
| COL* | 0.0 | 0.0 - 4.3  |                                                           |   |   |   |    |    |    |    |    | 7  | 33 | 25 | 14 | 5  |    | 1  |    |    |    |    |    |    |    |    |    |     | 0  |    |
| MER  | 0.0 | 0.0 - 4.3  |                                                           |   |   |   |    |    |    |    |    |    |    |    |    |    |    |    |    |    |    | 1  | 2  | 5  | 2  | 1  | 5  | 9   | 20 | 40 |
| NAL  | 1.2 | 0.2 - 6.4  | 1                                                         |   |   |   |    |    |    |    |    |    |    | 1  |    |    | 1  |    | 3  | 5  | 7  | 18 | 14 | 9  | 12 | 11 | 3  | 0   |    |    |
| STR  | 7.1 | 3.3 - 14.5 | 2                                                         | 1 |   | 1 | 1  | 1  |    |    | 7  | 10 | 17 | 11 | 19 | 11 |    |    |    | 1  | 1  | 1  |    |    | 1  |    |    | 0   |    |    |
| TET  | 8.2 | 4.0 - 16.0 | 2                                                         | 5 |   |   |    |    |    |    |    |    |    |    |    |    | 1  | 6  | 10 | 21 | 20 | 16 | 2  | 2  |    |    |    | 0   |    |    |

238 In accordance with the Clinical Laboratory Standards Institute (CLSI) human clinical break points, dark grey, light blue, and white fields represent numbers of isolates with  
 239 inhibition zone diameters for resistant, intermediate and susceptible Enterobacteriaceae, respectively. COL\*: break points for colistin were from the study by Galani et al. 2008.  
 240 AMC: amoxicillin-clavulanic acid, AMP: ampicillin, AZI: azithromycin, FOX: cefoxitin, CRO: ceftriaxone, CHL: chloramphenicol, CIP: ciprofloxacin, COL: colistin, MER:  
 241 meropenem, NAL: nalidixic acid, STR: streptomycin, TET: tetracycline. ATB: Antibiotic, R: resistance, CI: Confidence intervals were calculated as 95% binomial proportions and  
 242 presented as Wilson intervals

243           Among the 37 presumptive 3GCr *E. coli* screened on MAC+CTX, all isolates were  
244 resistant to ampicillin (100%), 21 isolates were resistant to ceftriaxone (55.8%), and none of  
245 the isolates was resistant to meropenem (Table 3). In total, 36 out of the 37 presumptive 3GCr  
246 *E. coli* were not susceptible (i.e., either resistant or intermediate) to a third-generation  
247 cephalosporin (CRO). These isolates were from 36 out of the 85 collected samples. The  
248 sample-level prevalence of *E. coli* non-susceptible to third-generation cephalosporin was  
249 calculated to be 42.3% (36/85) with a 95% confidence interval of 32.4% - 53.0%.

250 **Table 3. Distribution of inhibition zone diameters of presumptive third-generation cephalosporin resistant *E. coli* (n=37)**  
 251 **isolated on MacConkey agar supplemented with 1 µg/mL cefotaxime.**

| ATB  | %     | 95% CI      | Distribution (number) of inhibition zones diameters in mm |    |    |   |    |    |    |    |    |    |    |    |    |    |    |    |    |    |    |    |    |    |    |    |    |
|------|-------|-------------|-----------------------------------------------------------|----|----|---|----|----|----|----|----|----|----|----|----|----|----|----|----|----|----|----|----|----|----|----|----|
|      |       |             | 0                                                         | 7  | 8  | 9 | 10 | 11 | 12 | 13 | 14 | 15 | 16 | 17 | 18 | 19 | 20 | 21 | 22 | 23 | 24 | 25 | 26 | 27 | 28 | 29 | 30 |
| AMC  | 67.6  | 51.5 - 80.4 | 1                                                         | 6  | 10 | 5 |    | 1  | 2  |    |    | 1  | 1  |    |    | 4  | 4  |    |    |    |    |    |    | 1  | 1  |    | 0  |
| AMP  | 100.0 | 90.6 - 100  | 35                                                        | 1  |    | 1 |    |    |    |    |    |    |    |    |    |    |    |    |    |    |    |    |    |    |    |    | 0  |
| AZI  | 2.7   | 0.5 - 13.8  |                                                           |    |    | 1 |    |    |    |    | 4  | 9  | 2  | 2  | 4  | 6  | 2  | 3  | 1  | 1  | 1  |    |    |    |    |    | 1  |
| FOX  | 62.2  | 46.1 - 75.9 | 1                                                         |    | 1  |   | 2  | 1  | 1  | 7  | 10 | 3  |    | 1  | 1  |    | 1  |    |    |    |    | 4  | 2  | 2  |    |    | 0  |
| CRO  | 56.8  | 40.9 - 71.3 |                                                           |    |    |   | 6  | 2  |    |    |    | 1  | 1  | 1  | 2  | 3  | 5  | 8  | 5  | 2  | 1  |    |    |    |    |    | 0  |
| CHL  | 27.0  | 15.4 - 43.0 | 9                                                         | 1  |    |   |    |    |    |    |    |    |    | 1  |    |    | 1  | 2  | 2  | 6  | 5  | 1  |    | 3  | 3  | 2  | 1  |
| CIP  | 8.1   | 2.8 - 21.3  | 3                                                         |    |    |   |    |    |    |    |    |    |    |    |    |    |    |    |    | 1  |    |    | 1  | 3  | 2  | 4  | 23 |
| COL* | 2.7   | 0.5 - 13.8  |                                                           |    |    |   |    | 1  |    |    | 3  | 22 | 10 | 1  |    |    |    |    |    |    |    |    |    |    |    |    | 0  |
| MER  | 0.0   | 0.0 - 9.4   |                                                           |    |    |   |    |    |    |    |    |    |    |    |    |    |    |    |    |    |    |    | 1  | 1  | 3  | 11 | 21 |
| NAL  | 10.8  | 4.3 - 24.7  | 4                                                         |    |    |   |    |    |    |    |    |    |    |    |    |    | 3  | 4  | 7  | 7  | 6  | 4  | 1  | 1  |    | 0  |    |
| STR  | 32.4  | 19.6 - 48.5 | 11                                                        | 1  |    |   |    |    |    | 2  | 4  | 4  | 10 | 2  |    | 2  | 1  |    |    |    |    |    |    |    |    |    | 0  |
| TET  | 62.2  | 46.1 - 75.9 | 5                                                         | 15 |    |   | 2  | 1  |    |    |    |    |    |    |    |    |    | 1  | 3  | 4  | 5  | 1  |    |    |    | 0  |    |

252 In accordance with the Clinical Laboratory Standards Institute (CLSI) human clinical break points, dark grey, light blue, and white fields represent numbers of isolates with  
 253 inhibition zone diameters for resistant, intermediate and susceptible Enterobacteriaceae, respectively. COL\*: break points for colistin were from the study by Galani et al. 2008.  
 254 AMC: amoxicillin-clavulanic acid, AMP: ampicillin, AZI: azithromycin, FOX: cefoxitin, CRO: ceftriaxone, CHL: chloramphenicol, CIP: ciprofloxacin, COL: colistin, MER:  
 255 meropenem, NAL: nalidixic acid, STR: streptomycin, TET: tetracycline. ATB: Antibiotic, R: resistance, CI: Confidence intervals were calculated as 95% binomial proportions and  
 256 presented as Wilson intervals

257 Most presumptive Qr *E. coli* screened on MAC+CIP were resistant to tetracycline  
258 (90.9%), meanwhile 17 isolates were resistant to nalidixic acid (77.3%), 12 isolates were  
259 resistant to ciprofloxacin (54.5%), and none of the isolates was resistant to colistin or  
260 meropenem (Table4). All of the 22 presumptive Qr *E. coli* were resistant or intermediate to  
261 nalidixic acid or else to ciprofloxacin. These isolates were recovered from 22 out of 85  
262 collected samples. The sample-level prevalence of *E. coli* non-susceptible to quinolone  
263 antibiotics was calculated to be 25.9 % with a 95% confidence intervals of 17.8%- 36.1%. In  
264 total 12 out of the 22 Qr *E. coli* isolates were resistant to both nalidixic acid and ciprofloxacin,  
265 4 isolates were resistant to nalidixic acid only, 5 isolates were intermediate to nalidixic acid  
266 but susceptible to ciprofloxacin and 1 isolate was intermediate to both ciprofloxacin and  
267 nalidixic acid.

268 **Table 4. Distribution of inhibition zone diameters of presumptive quinolone resistant *E. coli* (n=22) isolated on MacConkey**  
 269 **agar supplemented with 0.5 µg/mL of ciprofloxacin**

| ATB  | %    | 95%<br>CI   | Distribution (number) of inhibition zone diameters in mm |   |   |   |    |    |    |    |    |    |    |    |    |    |    |    |    |    |    |    |    |    |    |    |    |     |
|------|------|-------------|----------------------------------------------------------|---|---|---|----|----|----|----|----|----|----|----|----|----|----|----|----|----|----|----|----|----|----|----|----|-----|
|      |      |             | 0                                                        | 7 | 8 | 9 | 10 | 11 | 12 | 13 | 14 | 15 | 16 | 17 | 18 | 19 | 20 | 21 | 22 | 23 | 24 | 25 | 26 | 27 | 28 | 29 | 30 | >30 |
| AMC  | 18.2 | 7.3 - 38.5  |                                                          |   |   |   | 1  | 1  | 2  |    |    |    | 1  | 2  | 2  | 3  | 5  | 3  | 1  |    |    |    |    |    |    | 1  |    | 0   |
| AMP  | 59.1 | 38.7- 76.7  | 10                                                       | 2 |   |   |    | 1  |    |    |    |    |    | 1  | 3  | 3  | 1  | 1  |    |    |    |    |    |    |    |    |    | 0   |
| AZI  | 9.1  | 2.5 - 27.8  |                                                          |   | 1 |   |    |    | 1  | 7  | 9  | 4  |    |    |    |    |    |    |    |    |    |    |    |    |    |    |    | 0   |
| FOX  | 9.1  | 2.5 - 27.8  |                                                          |   |   |   |    |    |    | 1  | 1  |    | 1  |    | 1  |    | 2  | 1  | 2  | 3  | 5  | 4  | 1  |    |    |    |    | 0   |
| CRO  | 4.5  | 0.8 - 21.8  |                                                          |   |   | 1 |    |    |    |    |    |    |    |    |    |    |    | 3  |    | 1  |    |    |    | 1  | 1  | 3  | 5  | 7   |
| CHL  | 77.3 | 56.6 - 89.9 | 16                                                       | 1 |   |   |    |    |    |    |    |    |    |    |    | 1  |    | 1  |    |    | 3  |    |    |    |    |    |    | 0   |
| CIP  | 54.5 | 34.7 - 73.1 | 8                                                        | 1 |   | 1 |    | 2  |    |    |    |    |    |    |    |    | 1  | 2  | 1  |    | 3  | 1  | 1  | 1  |    |    |    | 0   |
| *COL | 0.0  | 0.0 - 14.9  |                                                          |   |   |   |    |    |    | 4  | 15 | 2  | 1  |    |    |    |    |    |    |    |    |    |    |    |    |    |    | 0   |
| MER  | 0.0  | 0.0 - 14.9  |                                                          |   |   |   |    |    |    |    |    |    |    |    |    |    |    |    |    |    |    |    | 1  | 1  | 2  | 8  | 4  | 6   |
| NAL  | 77.3 | 56.6 - 89.9 | 13                                                       | 1 |   |   |    |    | 1  | 2  |    | 2  | 1  | 1  | 1  |    |    |    |    |    |    |    |    |    |    |    |    | 0   |
| STR  | 63.6 | 43.0 - 80.3 | 9                                                        | 1 | 1 |   |    | 3  | 3  |    | 3  |    | 1  | 1  |    |    |    |    |    |    |    |    |    |    |    |    |    | 0   |
| TET  | 90.9 | 72.2 - 97.5 | 14                                                       | 6 |   |   |    |    |    |    |    |    |    |    |    |    |    |    | 1  |    |    |    |    |    |    | 1  |    | 0   |

270 In accordance with the Clinical Laboratory Standards Institute (CLSI) human clinical break points, dark grey, light blue, and white fields represent numbers of isolates with  
 271 inhibition zone diameters for resistant, intermediate and susceptible Enterobacteriaceae, respectively. COL\*: break points for colistin were from the study by Galani et al. 2008.  
 272 AMC: amoxicillin-clavulanic acid, AMP: ampicillin, AZI: azithromycin, FOX: ceftioxin, CRO: ceftriaxone, CHL: chloramphenicol, CIP: ciprofloxacin, COL: colistin, MER:  
 273 meropenem, NAL: nalidixic acid, STR: streptomycin, TET: tetracycline. ATB: Antibiotic, R: resistance, CI: Confidence intervals were calculated as 95% binomial proportions and  
 274 presented as Wilson intervals  
 275

276 Resistance to antibiotics among *Salmonella* isolated on culture media without  
277 antibiotics was very low yielding a single isolate that was resistant to only streptomycin. The  
278 sole *Salmonella* isolated on XLD+CTX was confirmed to be resistant to CRO.

## 279 **Phenotypic and genotypic detection of ESBL- and AmpC-** 280 **producing bacteria**

281 The sole *Salmonella* isolated from XLD+CTX plates, exhibited the phenotype of an AmpC  
282 beta-lactamase producer; later, this was confirmed by the presence of *bla*<sub>CMY-2</sub> gene using  
283 cPCR.

284 A total of 40 *E. coli* isolates were found to be resistant or intermediate to ceftriaxone.  
285 Thirty-six of them were isolated from MAC+CTX and four were isolated from MAC+CIP  
286 plates. The second panel of antibiotics showed that these isolates were resistant to at least one  
287 of the third-generation cephalosporins tested; furthermore all of them were resistant to  
288 cefazolin. Only a very few of these *E. coli* isolates were resistant to sulfisoxazole and  
289 trimethoprim/sulfamethoxazole (Table 5).

290

291

292

293

294

295

296

297

298



299 **Table 5. Distribution of inhibition zone diameters of all *E. coli* isolates (n=40) not susceptible to third-generation**  
 300 **cephalosporins (i.e., second panel of antibiotics)**

| ATB     | %    | 95%<br>CI   | Distribution (number) of inhibition zone diameters in mm |   |   |   |    |    |    |    |    |    |    |    |    |    |    |    |    |    |    |    |    |    |    |    |    |     |   |   |   |   |
|---------|------|-------------|----------------------------------------------------------|---|---|---|----|----|----|----|----|----|----|----|----|----|----|----|----|----|----|----|----|----|----|----|----|-----|---|---|---|---|
|         |      |             | 0                                                        | 7 | 8 | 9 | 10 | 11 | 12 | 13 | 14 | 15 | 16 | 17 | 18 | 19 | 20 | 21 | 22 | 23 | 24 | 25 | 26 | 27 | 28 | 29 | 30 | >30 |   |   |   |   |
| AMK     | 0    | 0.0 - 8.8   |                                                          |   |   |   |    |    |    |    |    |    |    |    |    |    |    |    |    |    |    |    |    |    |    |    |    |     |   |   |   |   |
| CFZ     | 100  | 91.2 - 100  | 28                                                       | 2 | 1 | 7 | 1  |    |    | 1  |    |    |    |    |    |    |    |    |    |    |    |    |    |    |    |    |    |     |   |   |   |   |
| FEP     | 0    | 0.0 - 8.8   |                                                          |   |   |   |    |    |    |    |    |    |    |    |    |    |    |    |    |    |    |    |    |    |    |    |    |     |   |   |   |   |
| CTX     | 82.5 | 68.0 - 91.2 |                                                          |   |   | 1 | 2  |    | 7  |    |    |    |    | 1  |    | 1  |    |    |    | 3  | 5  | 5  | 8  | 3  |    | 3  |    |     |   |   |   |   |
| CTX-CLA |      |             |                                                          |   |   |   |    |    |    |    | 1  |    |    |    | 1  | 1  | 2  | 4  | 4  | 2  | 8  | 3  | 1  | 1  | 1  |    | 1  | 4   | 2 | 4 |   |   |
| CAZ     | 25   | 14.2 - 40.2 |                                                          | 1 |   |   |    |    |    |    |    |    | 1  |    |    | 3  | 5  | 5  | 12 | 8  | 1  | 3  |    |    |    |    |    |     |   |   |   |   |
| CAZ-CLA |      |             |                                                          |   |   |   |    |    |    |    |    | 1  | 1  |    |    | 3  | 2  | 2  | 4  | 1  | 6  | 4  | 2  | 3  | 1  | 2  | 3  | 1   | 2 | 5 | 2 | 1 |
| FOS     | 0    | 0.0 - 8.8   |                                                          |   |   |   |    |    |    |    |    |    |    |    |    |    |    |    |    |    |    |    |    |    |    |    |    |     |   |   |   |   |
| GEN     | 0    | 0.0 - 8.8   |                                                          |   |   |   |    |    |    |    |    |    |    |    |    |    | 2  | 1  | 1  | 7  | 7  | 7  | 10 | 4  | 1  |    |    |     |   |   |   |   |
| IMP     | 0    | 0.0 - 8.8   |                                                          |   |   |   |    |    |    |    |    |    |    |    |    |    |    |    |    |    |    |    |    |    |    |    |    |     |   |   |   |   |
| SSS     | 32.5 | 20.1 - 48.0 | 13                                                       |   |   |   |    |    |    |    |    |    |    |    |    |    |    |    |    |    |    |    |    |    |    |    |    |     |   |   |   |   |
| SXT     | 40   | 26.3 - 55.4 | 16                                                       |   |   |   |    |    |    |    |    |    |    |    |    |    |    |    |    |    |    |    |    |    |    |    |    |     |   |   |   |   |
| ESBL    | 47.5 | 32.9 - 62.5 |                                                          |   |   |   |    |    |    |    |    |    |    |    |    |    |    |    |    |    |    |    |    |    |    |    |    |     |   |   |   |   |
| AmpC    | 50   | 35.2 - 64.8 |                                                          |   |   |   |    |    |    |    |    |    |    |    |    |    |    |    |    |    |    |    |    |    |    |    |    |     |   |   |   |   |

301 In accordance with the Clinical Laboratory Standards Institute (CLSI) human clinical break points, dark grey, light blue, and white fields represent numbers of isolates with  
 302 inhibition zone diameters for resistant, intermediate and susceptible Enterobacteriaceae, respectively. CLSI clinical break points for enterobacteriaceae resistant to antibiotic are  
 303 represented by a vertical solid line in the table. There are no CLSI clinical break points for CTX-CLA and CAZ-CLA. AMK: amikacin, CFZ: cefazolin, FEP: cefepime, CTX:  
 304 cefotaxime, CAZ: ceftazidime, FOS: fosfomicin, GEN: gentamicin, IMP: imipenem, SSS: sulfisoxazole, SXT: trimethoprim/sulfamethoxazole. ATB: Antibiotic R: resistance. CI:  
 305 Confidence intervals were calculated as 95% binomial proportions and presented as Wilson intervals. The line with ESBL represents the percentage of *E. coli* isolates producing  
 306 ESBLs. The line with AmpC represents the percentage *E. coli* with a phenotype of AmpC beta-lactamase producers isolates producing AmpC.

307  
308           The phenotypic combination disk test detected 19 *E. coli* isolates with a phenotype  
309 indicating ESBL-production, 20 isolates with a phenotype indicating AmpC beta-lactamase-  
310 production and a single isolate that was not confirmed to be resistant to either cefotaxime or  
311 ceftazidime. On the other hand, molecular cPCR detected genes encoding for ESBL  
312 production (*bla*<sub>CTX-M-1</sub> or *bla*<sub>CTX-M-9</sub> family genes) in 10 isolates (25.0%), the gene encoding  
313 for AmpC beta-lactamase production (i.e., *bla*<sub>CMY-2</sub>) in 29 isolates (72.5%) and none of these  
314 genes in one isolate (2.5%).

### 315 **Whole genome sequencing of select *E. coli* isolates**

316           Whole genome sequencing of 24 *E. coli* isolates showed that the gene *tet(A)* encoding  
317 for a tetracycline efflux pump, was present in 70.8% of sequenced isolates. In general, all the  
318 detected genes were in accordance with the phenotypic antibiotic resistance observed in each  
319 of the isolate tested. Some exception included the presence of the *aph (3')-Ia* gene that  
320 purportedly confers resistance to aminoglycosides, though in our case, in isolates  
321 phenotypically susceptible to these antibiotics. The mutation *gyrA*[87:D-Y] that confers  
322 resistance to quinolone antibiotics was observed in one isolate exhibiting no phenotypic  
323 resistance to either nalidixic acid or ciprofloxacin. The presence of the *mef(B)* gene that  
324 encodes for resistance to macrolides was detected in one isolate susceptible to azithromycin.  
325 Finally, the mutation *pmrB*[161: V-G] that confers resistance to polymixins was observed in  
326 an isolate phenotypically susceptible to colistin (Fig. 1).

327           Finally, WGS revealed that *E. coli* isolates resistant to nalidixic acid typically had only a  
328 single point mutation in the *gyrA* gene or else harbored a plasmid-mediated quinolone-resistance  
329 gene (*qnr*). All isolates resistant to both nalidixic acid and ciprofloxacin had a mutation in both  
330 *gyrA* and *parE* or *parC* genes of the quinolone resistance determining region (QRDR).

## 331 **Discussion**

332           This study was conducted to field-test a cost-effective and highly valid protocol that  
333 could be used to determine the status of antibiotic resistance among *E. coli* and *Salmonella*  
334 isolated from food-producing animals, especially where laboratory resources are limited. The  
335 protocol used in this study was inspired by different guidelines for antimicrobial resistance  
336 detection, including guidelines from the European Food Safety Authority(EFSA)[14], the U.S  
337 National Antimicrobial Resistance Monitoring System (NARMS)[2], the European Union  
338 Reference Laboratory for Antimicrobial Resistance (EURL-AR)[15], and the Danish Integrated  
339 Antimicrobial Resistance Monitoring and Research Program (DANMAP)[16]. Unlike the above  
340 mentioned guidelines, this protocol used the disk diffusion method instead of broth or agar  
341 dilution methods because disk diffusion is recognized as a simple and low-cost method when  
342 compared to other antibiotic susceptibility testing methods[17]. To increase our confidence in  
343 recommending the protocol, results of the phenotypic methods used herein were thereafter cross-  
344 referenced and validated using by results from relevant molecular methods.

345           In regard to results obtained in this study, all NTS *E. coli* and *Salmonella* isolated on  
346 bacterial culture media without supplemented antibiotics were largely susceptible to all  
347 antibiotics tested; meanwhile, bacteria isolated on culture media with antibiotics supplemented at  
348 sub-breakpoint levels tended to be resistant to more than three antibiotics. This observation  
349 provided evidence that when a bacterium acquires resistance to one antibiotic it tends also to be

350 resistant to other antibiotics. In fact, in most of the cases, different genes encoding antibiotic  
351 resistance are known to be co-located on transmissible genetic elements such as plasmids. When  
352 a resistance plasmid is transferred to a previously susceptible bacterium, multidrug resistance can  
353 be transferred in a single conjugation event[18].

354 Furthermore, percentages of samples that generated presumptive 3GCr *E. coli* (43.5%)  
355 and presumptive 3GCr *Salmonella* (1.2%) were lower than the percentages of samples with  
356 presumptive 3GCr *E. coli* (89.1%) and presumptive 3GCr *Salmonella* (10.9%) reported in three  
357 beef feed lots in Nebraska[19]. In addition, similar to the study in Nebraska[19], we also noted  
358 that the number of 3GCr *E. coli* isolates phenotypically or genotypically confirmed to be AmpC-  
359 producers was higher than the number of isolates confirmed to be ESBLs-producers. The only  
360 identified 3GCr *Salmonella* was confirmed to be an AmpC beta-lactamase producer. In the U.S,  
361 resistance to third-generation cephalosporins among *Salmonella* from food animals has  
362 historically been largely due to the gene *bla*<sub>CMY-2</sub> encoding for AmpC beta-lactamase  
363 production [20].

364 In the present study, nine 3GCr *E. coli* had a phenotype typical of ESBL-production  
365 (according to the CDT) while the cPCR showed that these isolates carried *bla*<sub>CMY-2</sub>, a gene  
366 encoding for AmpC beta-lactamase production, instead of genes encoding for an ESBL. The  
367 combination disk test is reported to be an accurate phenotypic method and is widely used to  
368 detect ESBL-producing Enterobacteriaceae[21]. Despite its widespread use and solid reputation,  
369 the sensitivity and specificity of this method to detect ESBL-producing Enterobacteriaceae is not  
370 always 100%[22]. In fact, different authors have reported a number false positive ESBL-  
371 producing Enterobacteriaceae by the CDT in their investigations [23–26].

372 To mitigate misclassification of bacterial isolates as ESBL-producers using phenotypic  
373 methods, some of these authors have suggested modifications of standard methods, such as the  
374 CDT, in order to increase their efficacy in discriminating ESBL-producing bacteria from AmpC  
375 beta-lactamase-producing bacteria[23,24]. Along this line, our study illustrates that when the  
376 combination disk test is used to identify ESBLs-producing *E. coli*, some precaution should be  
377 taken as the test may produce several false positive *E. coli* producing ESBLs, especially when  
378 the results are close to 5 mm decision point. A close look at the 9 *E. coli* isolates falsely  
379 classified as ESBL-producers showed that the difference between inhibition zone diameters  
380 around cefotaxime with clavulanic acid and around cefotaxime was less than 5mm for all the  
381 isolates. In contrast, the difference between inhibition zone diameters around ceftazidime with  
382 clavulanic acid and around ceftazidime was equal to 5mm or slightly higher than 5mm. The later  
383 observation led to the conclusion of classifying these same isolates as ESBL-producers.  
384 Importantly, 8 of the 9 isolates were not susceptible to cefoxitin (a second-generation  
385 cephalosporin (cephamycin) antibiotic).

386 Based on observations made in this study, we came up with the following rule of thumb:  
387 false positive ESBL-producing *E. coli* can be detected by looking at the increase in inhibition  
388 zone diameters around CAZ-CLA versus CAZ and around CTX-CLA versus CTX. False  
389 positive ESBL-producing *E. coli* can be identified as isolates for which inhibition zone diameters  
390 around ceftazidime is increased by 5mm or slightly higher (6mm) due to clavulanic acid while  
391 the increase of the inhibition zone diameter around cefotaxime caused by clavulanic acid is less  
392 than 5mm. When false positives are identified, we recommend using the information generated  
393 by CTX with and without CLA to classify an isolate as ESBL- or AmpC-producer. In addition, a  
394 look at bacterial isolates' susceptibility to cefoxitin (a cephamycin) or amoxicillin-clavulanic

395 acid maybe helpful to conclude that an isolate is not an ESBL-producer but might be an AmpC-  
396 producer. It is reported that AmpC-producing Enterobacteriaceae are resistant to cephamycins  
397 such as cefoxitin while ESBL-producers are susceptible to cephamycins[27,28].

398 In general, WGS showed that phenotypic antibiotic resistance observed in *E. coli* isolates  
399 was a good indicator of the presence of genetic antibiotic resistance determinants, with only few  
400 a exceptions. The observed discordance may be explained by the fact that the presence of a  
401 resistance gene doesn't always mean its expression. In addition, some genes are cryptic or even  
402 misclassified as to their primary purpose in bacterial host function. Results of WGS also showed  
403 that all isolates resistant to both NAL and CIP had mutations in both genes of the quinolone  
404 resistance determining region (QRDR) while isolates resistant to NAL alone had a single  
405 mutation in one of the target genes, else or carried a plasmid mediated quinolone-resistance gene  
406 (*qnr* gene). In fact, mutations in the QRDR have been identified as the common genetic  
407 determinant conferring a higher level of resistance to quinolone antibiotics while PMQR genes  
408 confer moderate resistance[29,30]. Several studies have proven that the detection of genetic  
409 determinants of antibiotic resistance by WGS accurately predicts antibiotic resistance phenotypic  
410 behavior of bacterial isolates[6,31]. High level of agreement between WGS and phenotypic  
411 antibiotic susceptibility testing have been reported [32,33].

412 In conclusion, this study established that bacteria resistant to antibiotics were present in  
413 dairy cattle on the study farm but at a low level. The addition of an antibiotic to the culture  
414 medium of isolation helped in detecting and later characterizing the few antibiotic resistant  
415 bacteria. The developed protocol can help to establish percentages of indicator *E. coli* resistant to  
416 various antibiotics, including critically important antibiotics for human medicine, at a relatively  
417 low cost and with high reliability, even in the developing world. Furthermore, cPCR and WGS

418 both supported our phenotypic findings at a high level which increased our confidence in  
419 recommending the tested protocol for its use to establish status of AMR in food animals;  
420 specifically, when laboratory facilities are limited and financial and other resources are scarce.

## 421 **Acknowledgements**

422 We acknowledge the dairy farm management that allowed us to collect fecal samples.

## 423 **Funding**

424  
425 This work was supported by the United States Agency for International Development, as  
426 part of the Feed the Future initiative, under the CGIAR Fund, award number BFS-G-11-00002.

## 427 **Conflict of interest**

428 All authors declare no conflicts of interest.

429

## 430 **References**

- 431 1. World Health Organization (WHO). Integrated Surveillance of Antimicrobial Resistance  
432 in Foodborne Bacteria: Application of a One Health Approach [Internet]. Geneva; 2017.  
433 doi:Licence: CC BY-NC-SA 3.0 IGO
- 434 2. The National Antimicrobial Resistance Monitoring System. The National Antimicrobial  
435 Resistance Monitoring System Manual of Laboratory Methods [Internet]. 2016. Available:  
436 [https://www.fda.gov/downloads/AnimalVeterinary/SafetyHealth/AntimicrobialResistance/  
437 NationalAntimicrobialResistanceMonitoringSystem/UCM528831.pdf](https://www.fda.gov/downloads/AnimalVeterinary/SafetyHealth/AntimicrobialResistance/NationalAntimicrobialResistanceMonitoringSystem/UCM528831.pdf)
- 438 3. Government of Canada. Canadian Integrated Program for Antimicrobial Resistance  
439 Surveillance (CIPARS) 2016 Annual Report [Internet]. Guelph, Ontario; 2018. Available:  
440 [http://publications.gc.ca/collections/collection\\_2018/aspc-phac/HP2-4-2016-eng.pdf](http://publications.gc.ca/collections/collection_2018/aspc-phac/HP2-4-2016-eng.pdf)
- 441 4. National Veterinary Assay Laboratory. Report on the Japanese Veterinary Antimicrobial  
442 Resistance Monitoring System 2014-2015 [Internet]. Tokyo; 2018. Available:  
443 [http://www.maff.go.jp/nval/yakuzai/yakuzai\\_p3.html](http://www.maff.go.jp/nval/yakuzai/yakuzai_p3.html)
- 444 5. European Union Food Safety Authority. ECDC/EFSA/EMA second joint report on the  
445 integrated analysis of the consumption of antimicrobial agents and occurrence of  
446 antimicrobial resistance in bacteria from humans and food-producing animals. EFSA J.  
447 2017;15. doi:10.2903/j.efsa.2017.4872

- 448 6. Neuert S, Nair S, Day MR, Doumith M, Ashton PM, Mellor KC, et al. Prediction of  
449 phenotypic antimicrobial resistance profiles from whole genome sequences of non-  
450 typhoidal *Salmonella enterica*. *Front Microbiol*. 2018;9: 1–11.  
451 doi:10.3389/fmicb.2018.00592
- 452 7. United States Department of Agriculture. The National Antimicrobial Resistance  
453 Monitoring System [Internet]. 2018 [cited 5 Feb 2019]. Available:  
454 [https://pregunteleakaren.gov/wps/portal/fsis/topics/regulatory-](https://pregunteleakaren.gov/wps/portal/fsis/topics/regulatory-compliance!/ut/p/a1/rVZLc5swGPwtOfioQUIP0NH1xG7tDq6dOI25ZARIVBleAZpp-usrnHbixA3CGcQBhHZX7Dc7n3BC59YJC_GoU9HqshBZNw_ZHdxAhvgMLiEy15cAX5HPywBDFxvA_hiw5mhuADeb9Wo2g36AX_PX82m3jOc3frBAkKB__HfGFPby)  
455 [compliance!/ut/p/a1/rVZLc5swGPwtOfioQUIP0NH1xG7tDq6dOI25ZARIVBleAZpp-](https://pregunteleakaren.gov/wps/portal/fsis/topics/regulatory-compliance!/ut/p/a1/rVZLc5swGPwtOfioQUIP0NH1xG7tDq6dOI25ZARIVBleAZpp-usrnHbixA3CGcQBhHZX7Dc7n3BC59YJC_GoU9HqshBZNw_ZHdxAhvgMLiEy15cAX5HPywBDFxvA_hiw5mhuADeb9Wo2g36AX_PX82m3jOc3frBAkKB__HfGFPby)  
456 [usrnHbixA3CGcQBhHZX7Dc7n3BC59YJC\\_GoU9HqshBZNw\\_ZHdxAhvgMLiEy15cA](https://pregunteleakaren.gov/wps/portal/fsis/topics/regulatory-compliance!/ut/p/a1/rVZLc5swGPwtOfioQUIP0NH1xG7tDq6dOI25ZARIVBleAZpp-usrnHbixA3CGcQBhHZX7Dc7n3BC59YJC_GoU9HqshBZNw_ZHdxAhvgMLiEy15cAX5HPywBDFxvA_hiw5mhuADeb9Wo2g36AX_PX82m3jOc3frBAkKB__HfGFPby)  
457 [X5HPywBDFxvA\\_hiw5mhuADeb9Wo2g36AX\\_PX82m3jOc3frBAkKB\\_\\_HfGFPby](https://pregunteleakaren.gov/wps/portal/fsis/topics/regulatory-compliance!/ut/p/a1/rVZLc5swGPwtOfioQUIP0NH1xG7tDq6dOI25ZARIVBleAZpp-usrnHbixA3CGcQBhHZX7Dc7n3BC59YJC_GoU9HqshBZNw_ZHdxAhvgMLiEy15cAX5HPywBDFxvA_hiw5mhuADeb9Wo2g36AX_PX82m3jOc3frBAkKB__HfGFPby)
- 458 8. Seale AC, Gordon NC, Islam J, Peacock SJ, Scott JAG. AMR Surveillance in low and  
459 middle-income settings - A roadmap for participation in the Global Antimicrobial  
460 Surveillance System (GLASS). *Wellcome Open Res*. 2017;2: 92.  
461 doi:10.12688/wellcomeopenres.12527.1
- 462 9. Ayukekbong JA, Ntemgwa M, Atabe AN. The threat of antimicrobial resistance in  
463 developing countries: Causes and control strategies. *Antimicrob Resist Infect Control*.  
464 *Antimicrobial Resistance & Infection Control*; 2017;6: 1–8. doi:10.1186/s13756-017-  
465 0208-x
- 466 10. Hoelzer K, Cummings KJ, Warnick LD, Schukken YH, Siler JD, Gröhn YT, et al. Agar  
467 Disk Diffusion and Automated Microbroth Dilution Produce Similar Antimicrobial  
468 Susceptibility Testing Results for *Salmonella* Serotypes Newport, Typhimurium, and  
469 4,5,12:i-, But Differ in Economic Cost . *Foodborne Pathog Dis*. 2011;8: 1281–1288.  
470 doi:10.1089/fpd.2011.0933
- 471 11. Clinical and Laboratory Standards Institute. M100 Performance Standards for  
472 Antimicrobial Susceptibility Testing. 28th ed. Clinical and Laboratory Standards Institute.  
473 Pennsylvania, USA: Clinical and Laboratory Standards Institute; 2018.
- 474 12. Galani I, Kontopidou F, Souli M, Rekatsina P, Koratzanis E, Deliolanis J, et al. Colistin  
475 susceptibility testing by Etest and disk diffusion methods. *Int J Antimicrob Agents*.  
476 2008;31: 434–439. doi:10.1016/j.ijantimicag.2008.01.011
- 477 13. Dallenne C, Da Costa A, Decré D, Favier C, Arlet G. Development of a set of multiplex  
478 PCR assays for the detection of genes encoding important  $\beta$ -lactamases in  
479 Enterobacteriaceae. *J Antimicrob Chemother*. 2010;65: 490–495. doi:10.1093/jac/dkp498
- 480 14. European Food Safety Authority (EFSA), Aerts M, Battisti A, Hendriksen R, Kempf I, C  
481 T, et al. Technical specifications on harmonised monitoring of antimicrobial resistance in  
482 zoonotic and indicator bacteria from food-producing animals and food. *EFSA J*. 2019;17:  
483 122p. doi:10.2903/j.efsa.2019.5709
- 484 15. Henrik Hasman, Agersø Y, Hendriksen R, Cavaco LM, Guerra-Roman B. Isolation of  
485 ESBL- , AmpC- and carbapenemase-producing *E. coli* from caecal samples. Version 7.  
486 Eur Union Ref Lab Antimicrob Resist (EURL-AR). 2019;  
487 doi:10.2903/j.efsa.2011.2322.OJ
- 488 16. Danish Integrated Antimicrobial Resistance Monitoring and Research Programme  
489 (DANMAP). DANMAP 2018 - Use of antimicrobial agents and occurrence of



- 490 antimicrobial resistance in bacteria from food animals, food and humans in Denmark  
491 [Internet]. Copenhagen; 2019. Available: [www.danmap.org](http://www.danmap.org)
- 492 17. Balouiri M, Sadiki M, Ibsouda SK. Methods for in vitro evaluating antimicrobial  
493 activity: A review. *J Pharm Anal*. Elsevier; 2016;6: 71–79.  
494 doi:10.1016/j.jpha.2015.11.005
- 495 18. Hiroshi N. Multidrug Resistance in Bacteria. *Annu Rev Biochem*. 2010;78: 119–146.  
496 doi:10.1146/annurev.biochem.78.082907.145923.Multidrug
- 497 19. Schmidt JW, Agga GE, Bosilevac JM, Brichta-Harhay DM, Shackelford SD, Wang R, et  
498 al. Occurrence of antimicrobial-resistant *Escherichia coli* and *Salmonella enterica* in the  
499 beef cattle production and processing continuum. *Appl Environ Microbiol*. American  
500 Society for Microbiology; 2015;81: 713–725. doi:10.1128/AEM.03079-14
- 501 20. The National Antimicrobial Resistance Monitoring System. NARMS integrated report,  
502 2015 [Internet]. Laurel, MD; 2017. Available:  
503 [https://www.fda.gov/AnimalVeterinary/SafetyHealth/AntimicrobialResistance/NationalA](https://www.fda.gov/AnimalVeterinary/SafetyHealth/AntimicrobialResistance/NationalAntimicrobialRe)  
504 [ntimicrobialRe](https://www.fda.gov/AnimalVeterinary/SafetyHealth/AntimicrobialResistance/NationalAntimicrobialRe)
- 505 21. European Committee on Antimicrobial Susceptibility Testing. EUCAST guidelines for  
506 detection of resistance mechanisms and specific resistances of clinical and/or  
507 epidemiological importance. Versio 2.0/2017 [Internet]. The European Committee on  
508 Antimicrobial Susceptibility Testing. 2017. Available:  
509 [http://www.eucast.org/fileadmin/src/media/PDFs/EUCAST\\_files/Resistance\\_mechanisms/](http://www.eucast.org/fileadmin/src/media/PDFs/EUCAST_files/Resistance_mechanisms/EUCAST_detection_of_resistance_mechanisms_170711.pdf)  
510 [EUCAST\\_detection\\_of\\_resistance\\_mechanisms\\_170711.pdf](http://www.eucast.org/fileadmin/src/media/PDFs/EUCAST_files/Resistance_mechanisms/EUCAST_detection_of_resistance_mechanisms_170711.pdf)
- 511 22. Drieux L, Brossier F, Sougakoff W, Jarlier V. Phenotypic detection of extended-spectrum  
512  $\beta$ -lactamase production in Enterobacteriaceae: Review and bench guide. *Clin Microbiol*  
513 *Infect*. European Society of Clinical Microbiology and Infectious Diseases; 2008;14: 90–  
514 103. doi:10.1111/j.1469-0691.2007.01846.x
- 515 23. Garrec H, Drieux-Rouzet L, Golmard JL, Jarlier V, Robert J. Comparison of nine  
516 phenotypic methods for detection of extended-spectrum  $\beta$ -lactamase production by  
517 enterobacteriaceae. *J Clin Microbiol*. 2011;49: 1048–1057. doi:10.1128/JCM.02130-10
- 518 24. Poulou A, Grivakou E, Vrioni G, Koumaki V, Pittaras T, Pournaras S, et al. Modified  
519 CLSI extended-spectrum  $\beta$ -lactamase (ESBL) confirmatory test for phenotypic detection  
520 of ESBLs among Enterobacteriaceae producing various  $\beta$ -lactamases. *J Clin Microbiol*.  
521 2014;52: 1483–1489. doi:10.1128/JCM.03361-13
- 522 25. Polsfuss S, Bloemberg G V., Giger J, Meyer V, Böttger EC, Hombach M. Evaluation of a  
523 diagnostic flow chart for detection and confirmation of extended spectrum  $\beta$ -lactamases  
524 (ESBL) in Enterobacteriaceae. *Clin Microbiol Infect*. 2012;18: 1194–1204.  
525 doi:10.1111/j.1469-0691.2011.03737.x
- 526 26. Robberts FJL, Kohner PC, Patel R. Unreliable extended-spectrum  $\beta$ -lactamase detection  
527 in the presence of plasmid-mediated AmpC in *Escherichia coli* clinical isolates. *J Clin*  
528 *Microbiol*. 2009;47: 358–361. doi:10.1128/JCM.01687-08
- 529 27. Jacoby GA. AmpC B-Lactamases. *Clin Microbiol Rev*. 2009;22: 161–182.  
530 doi:10.1128/CMR.00036-08

- 531 28. Paterson DL, Bonomo RA. Clinical Update Extended-Spectrum Beta-Lactamases : a  
532 Clinical Update. *Clin Microbiol Rev.* 2005;18: 657–686. doi:10.1128/CMR.18.4.657
- 533 29. Correia S, Poeta P, Michel H. Mechanisms of quinolone action and resistance : where do  
534 we stand ? *J Med Microbiol.* 2017;66: 551–559. doi:10.1099/jmm.0.000475
- 535 30. Redgrave LS, Sutton SB, Webber MA, Piddock LJ V. Fluoroquinolone resistance:  
536 Mechanisms, impact on bacteria, and role in evolutionary success. *Trends Microbiol.*  
537 2014;22: 438–445. doi:10.1016/j.tim.2014.04.007
- 538 31. Tyson GH, McDermott PF, Li C, Chen Y, Tadesse DA, Mukherjee S, et al. WGS  
539 accurately predicts antimicrobial resistance in *Escherichia coli*. *J Antimicrob Chemother.*  
540 2015;70: 2763–2769. doi:10.1093/jac/dkv186
- 541 32. Shelburne SA, Kim J, Munita JM, Sahasrabhojane P, Shields RK, Press EG, et al. Whole-  
542 Genome Sequencing Accurately Identifies Resistance to Extended-Spectrum  $\beta$ -Lactams  
543 for Major Gram-Negative Bacterial Pathogens. *Clin Infect Dis.* 2017;65: 738–745.  
544 doi:10.1093/cid/cix417
- 545 33. Kumburu HH, Sonda T, Zwetselaar M Van, Leekitcharoenphon P, Lukjancenko O,  
546 Mmbaga BT, et al. Using WGS to identify antibiotic resistance genes and predict  
547 antimicrobial resistance phenotypes in MDR *Acinetobacter baumannii* in Tanzania 1–3. *J*  
548 *Antimicrob Chemother.* 2019;74: 1484–1493. doi:10.1093/jac/dkz055

549

550

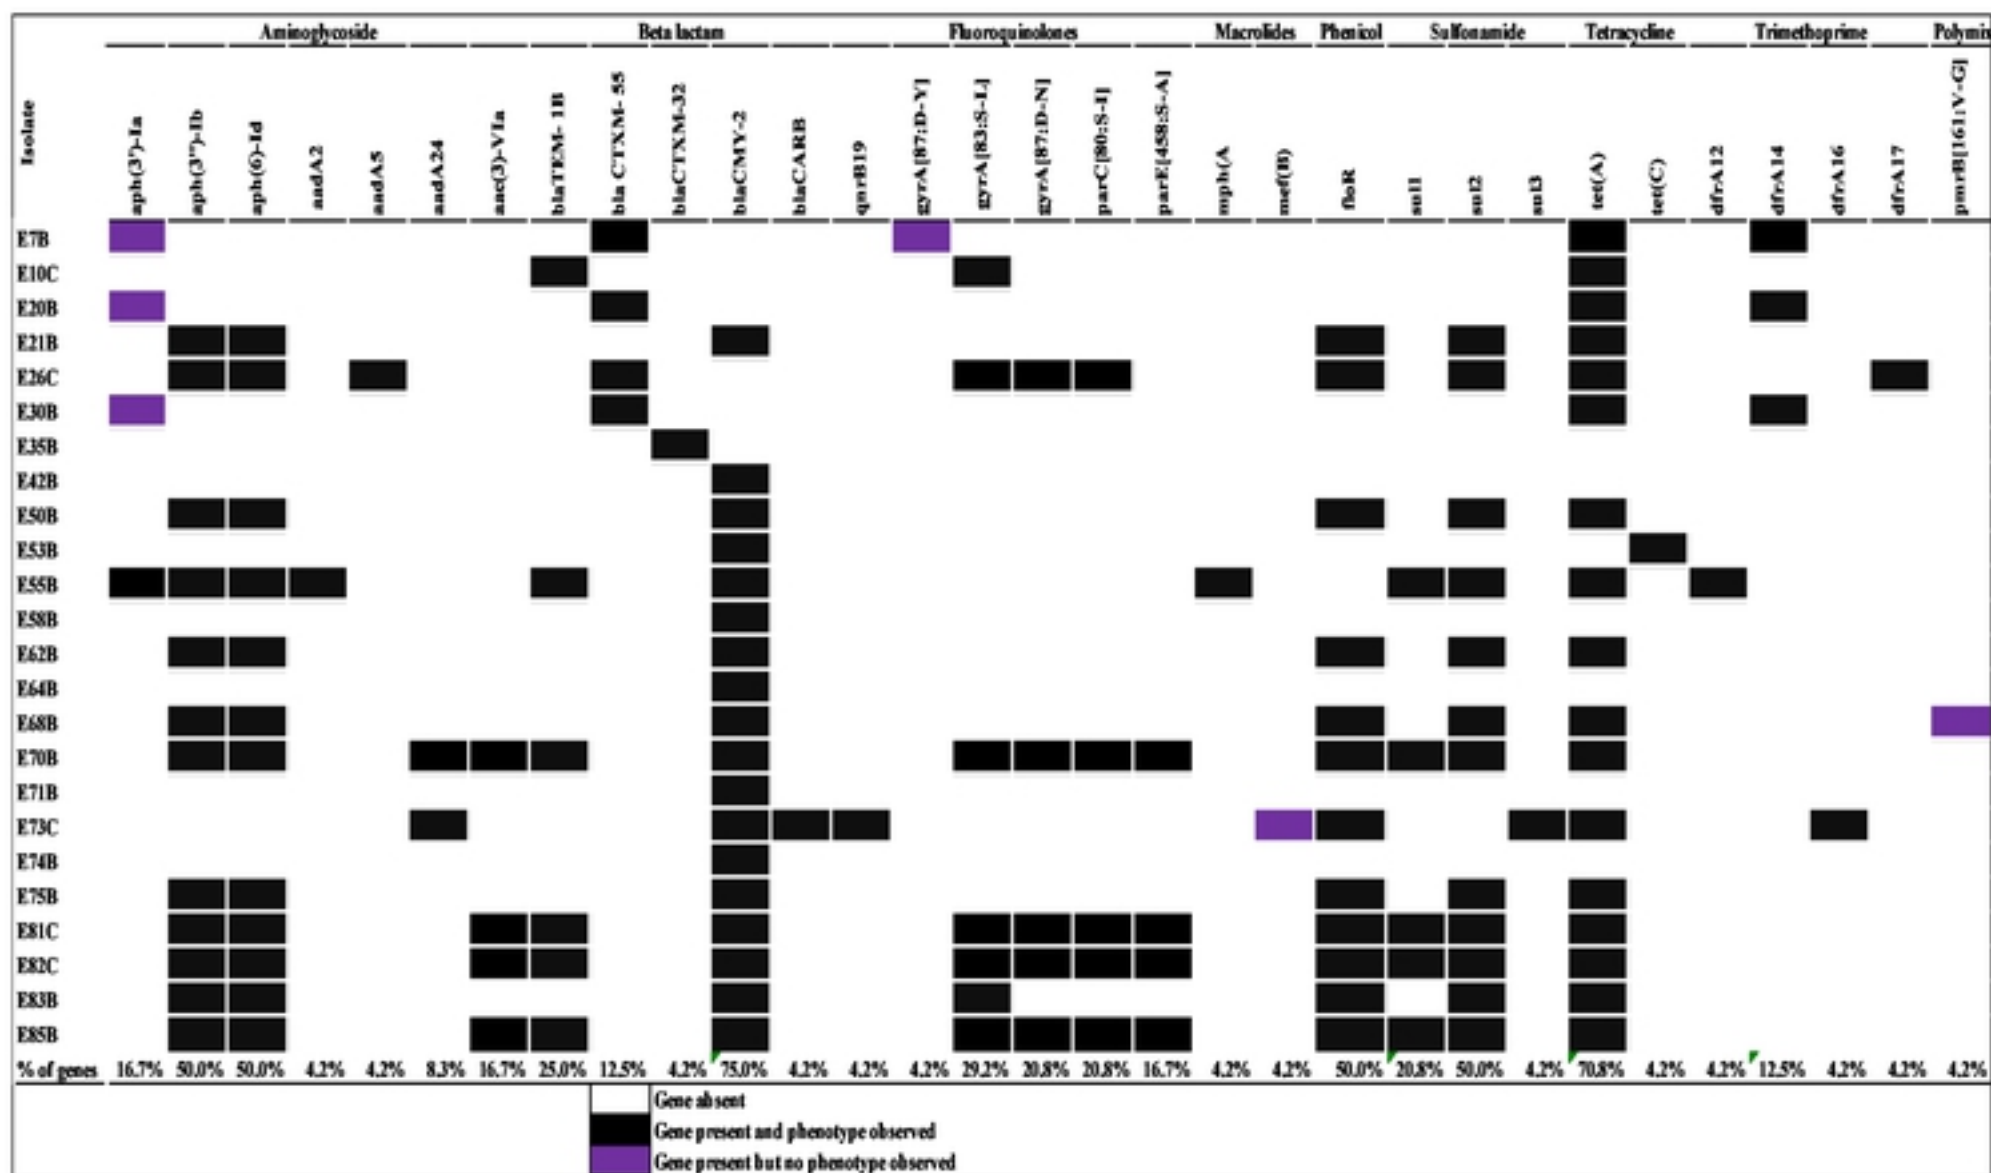

**Fig. 1. Genetic determinants of antibiotic resistance among *E. coli* isolated from cattle feces on a dairy farm in Texas.** Black cells indicate the presence of a resistance determinant and a phenotype of that determinant in a bacterial isolate. Purple cells indicate the presence of a resistance determinant without a corresponding phenotype in the same isolate. White cells indicate the absence of both resistance determinant and corresponding phenotype.
